# Supplementary material for: Highly functionalized pyrrolidine analogues: stereoselective synthesis and caspase-dependent apoptotic activity
Source: Royal Society of Chemistry journal article supplement (doi:10.1039/c8ra07985d), 2018-01-01
Supplement: c8ra07985d1.pdf [file c8ra07985d1.pdf]

## Highly functionalized pyrrolidine analogues: Stereoselective synthesis and caspase-dependent apoptotic activity

Raju Suresh Kumar, Abdulrahman I. Almansour, Natarajan Arumugam, Faruq Mohammad, Waleed Shihan Alshahrani, Kotresha D, Mohammad Altaf, Mohammad Azam and J. Carlos Menéndez

### Supplementary data

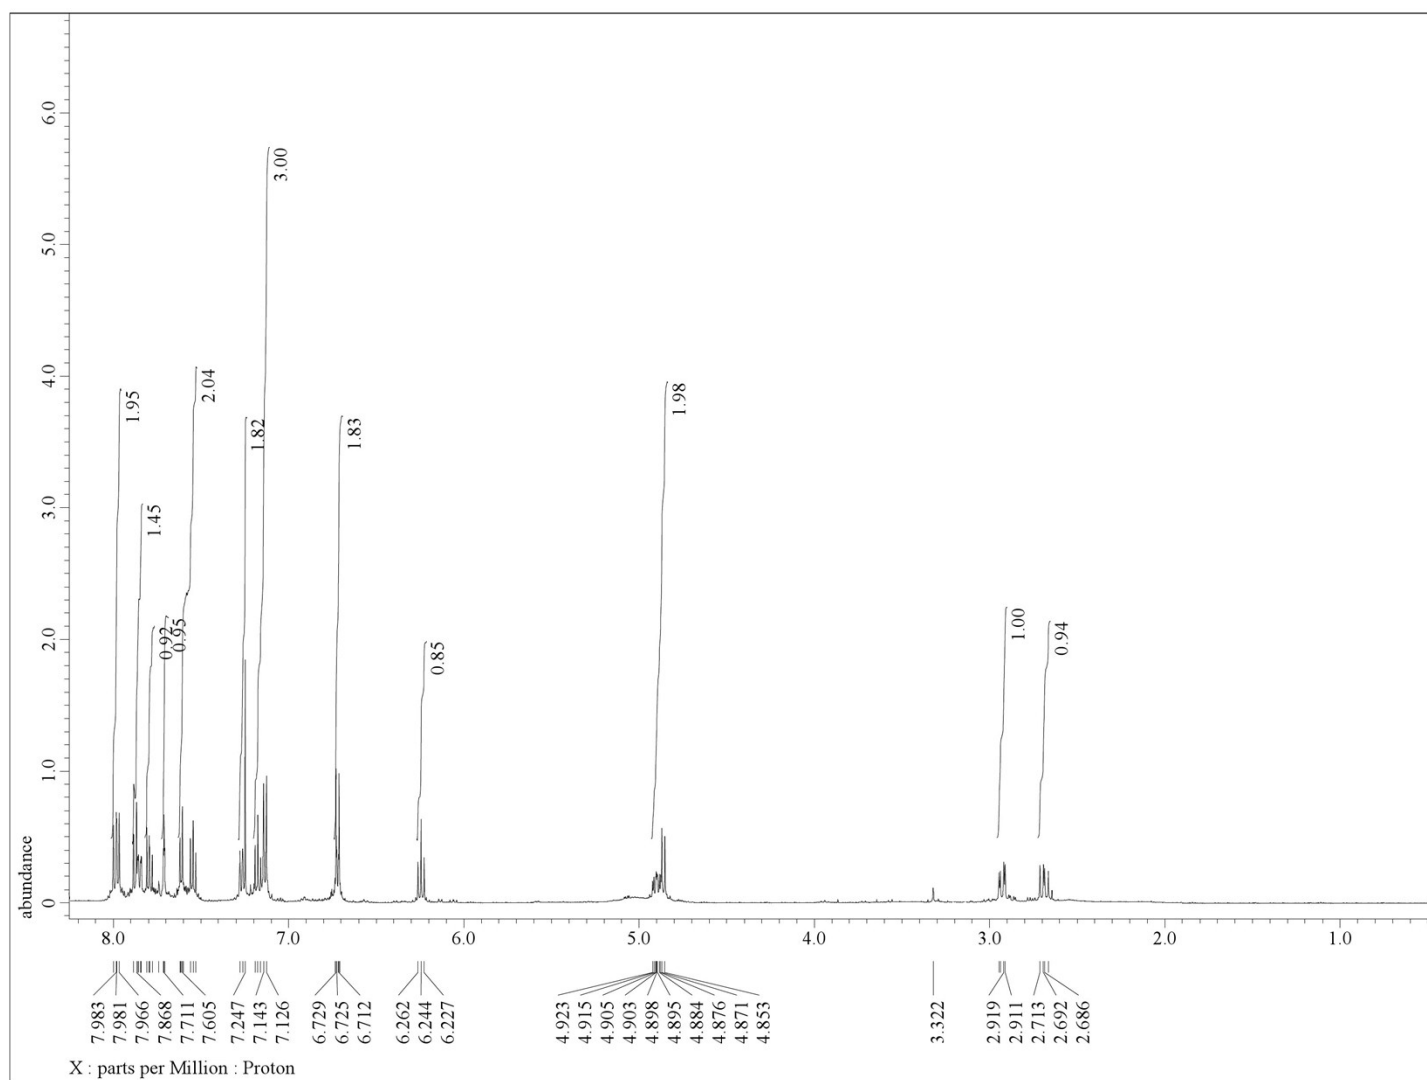

**Figure S1:** <sup>1</sup>H NMR spectrum of 4f

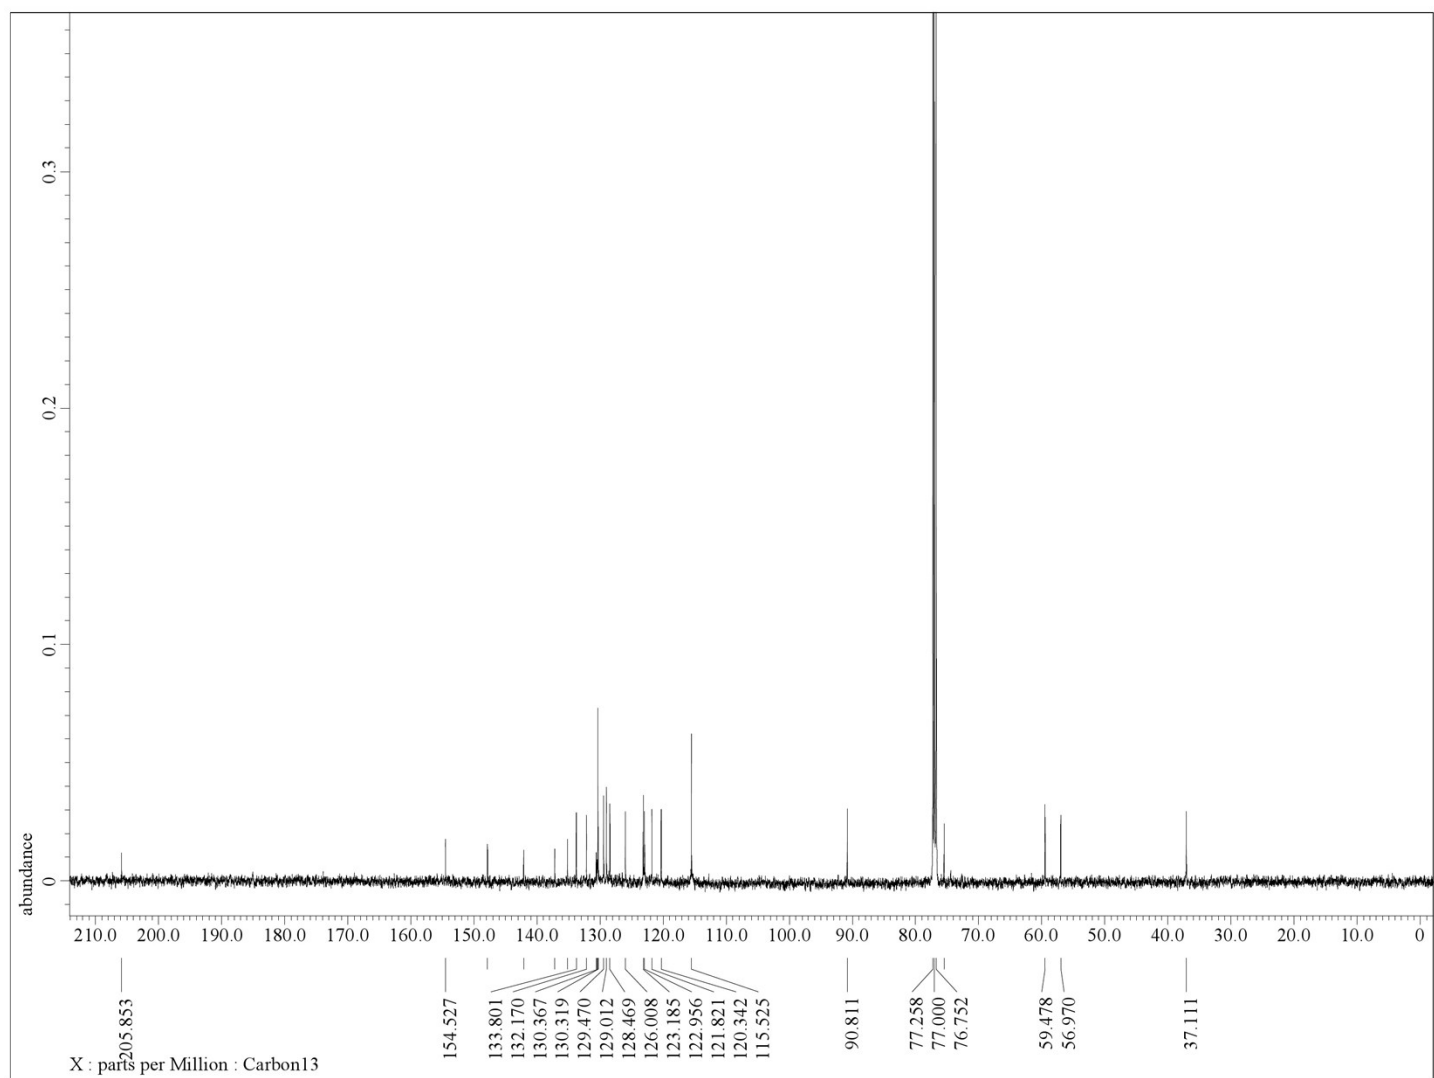

**Figure S2:**  $^{13}\text{C}$  NMR spectrum of **4f**

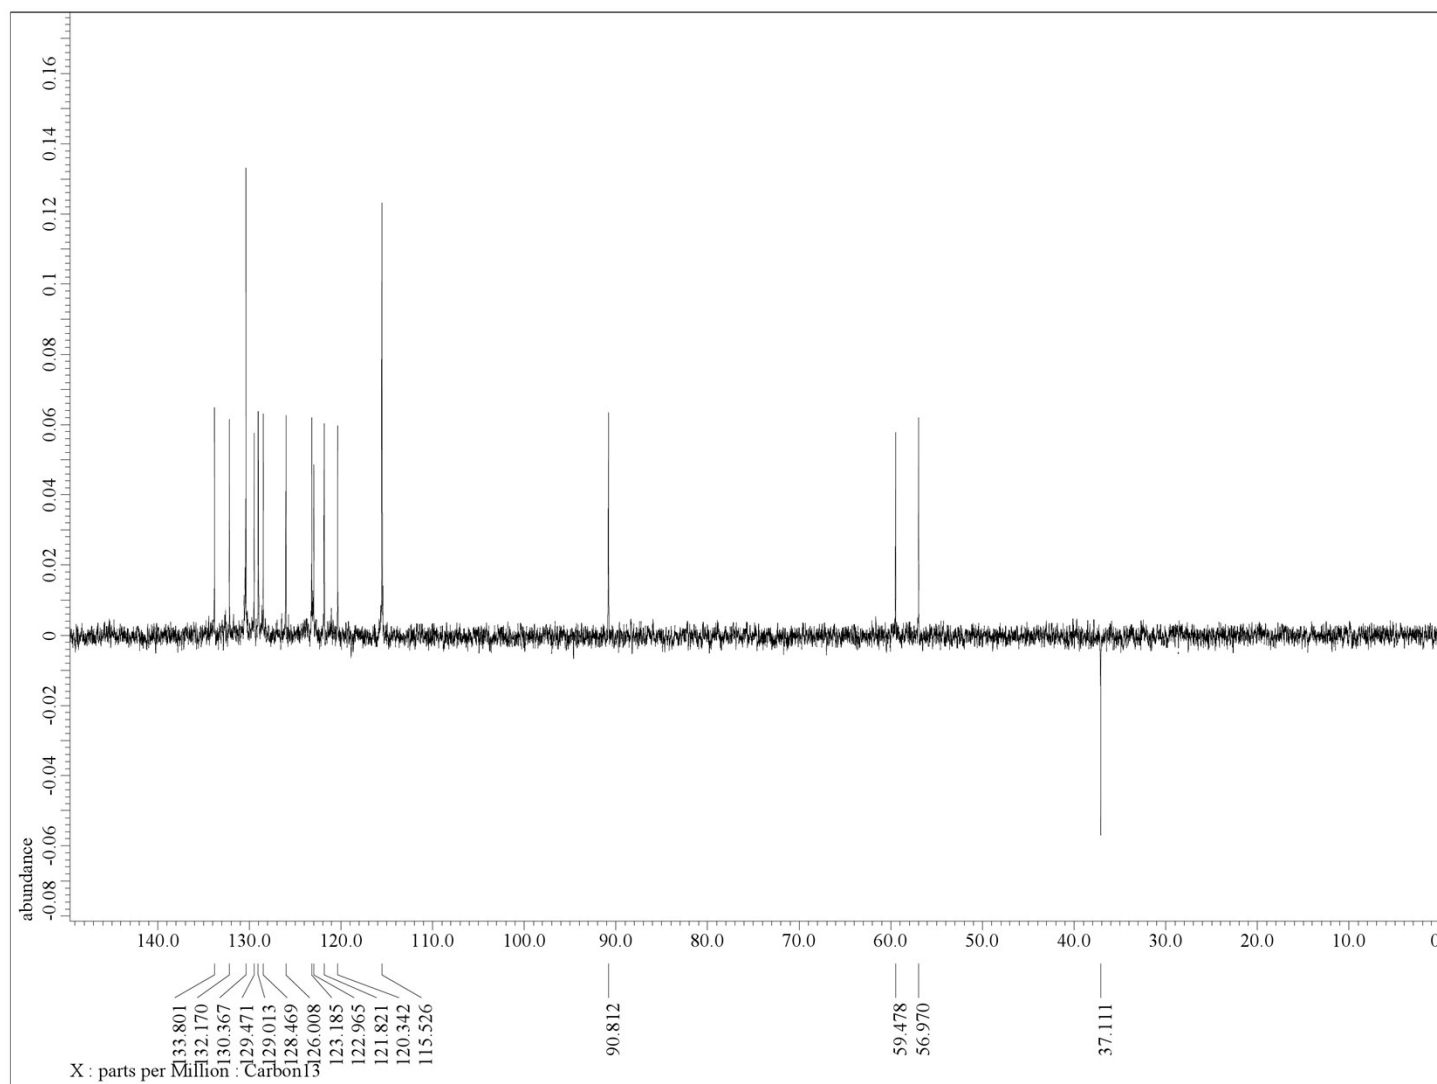

**Figure S3:** DEPT 135 NMR spectrum of **4f**

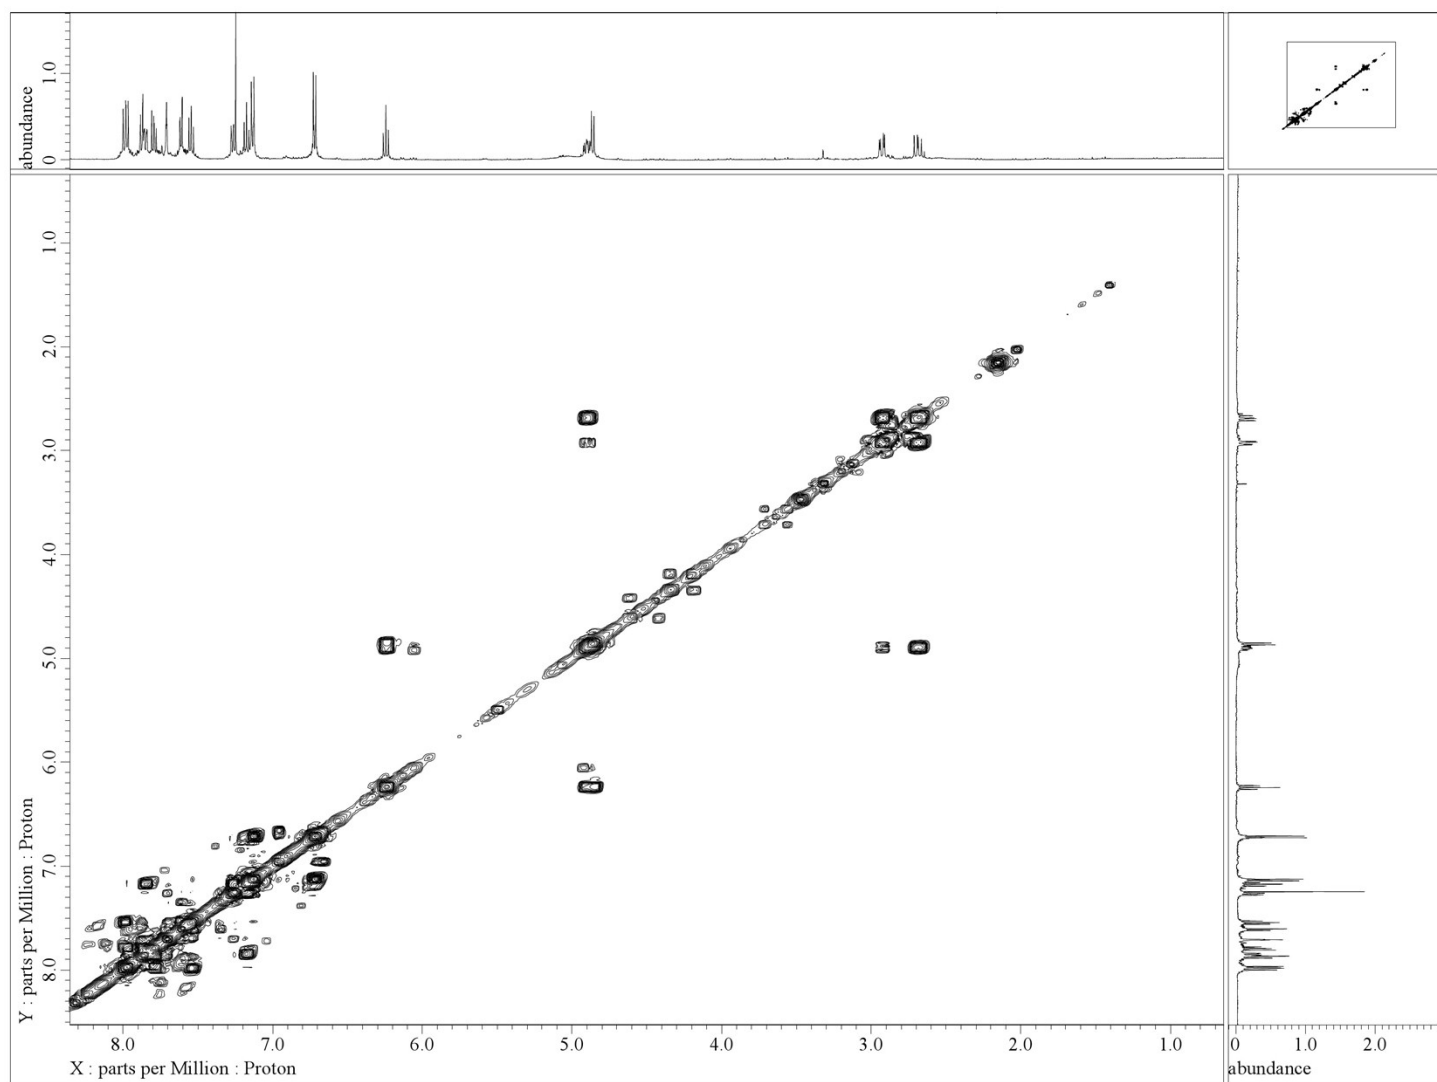

**Figure S4:** H, H-COSY spectrum of **4f**

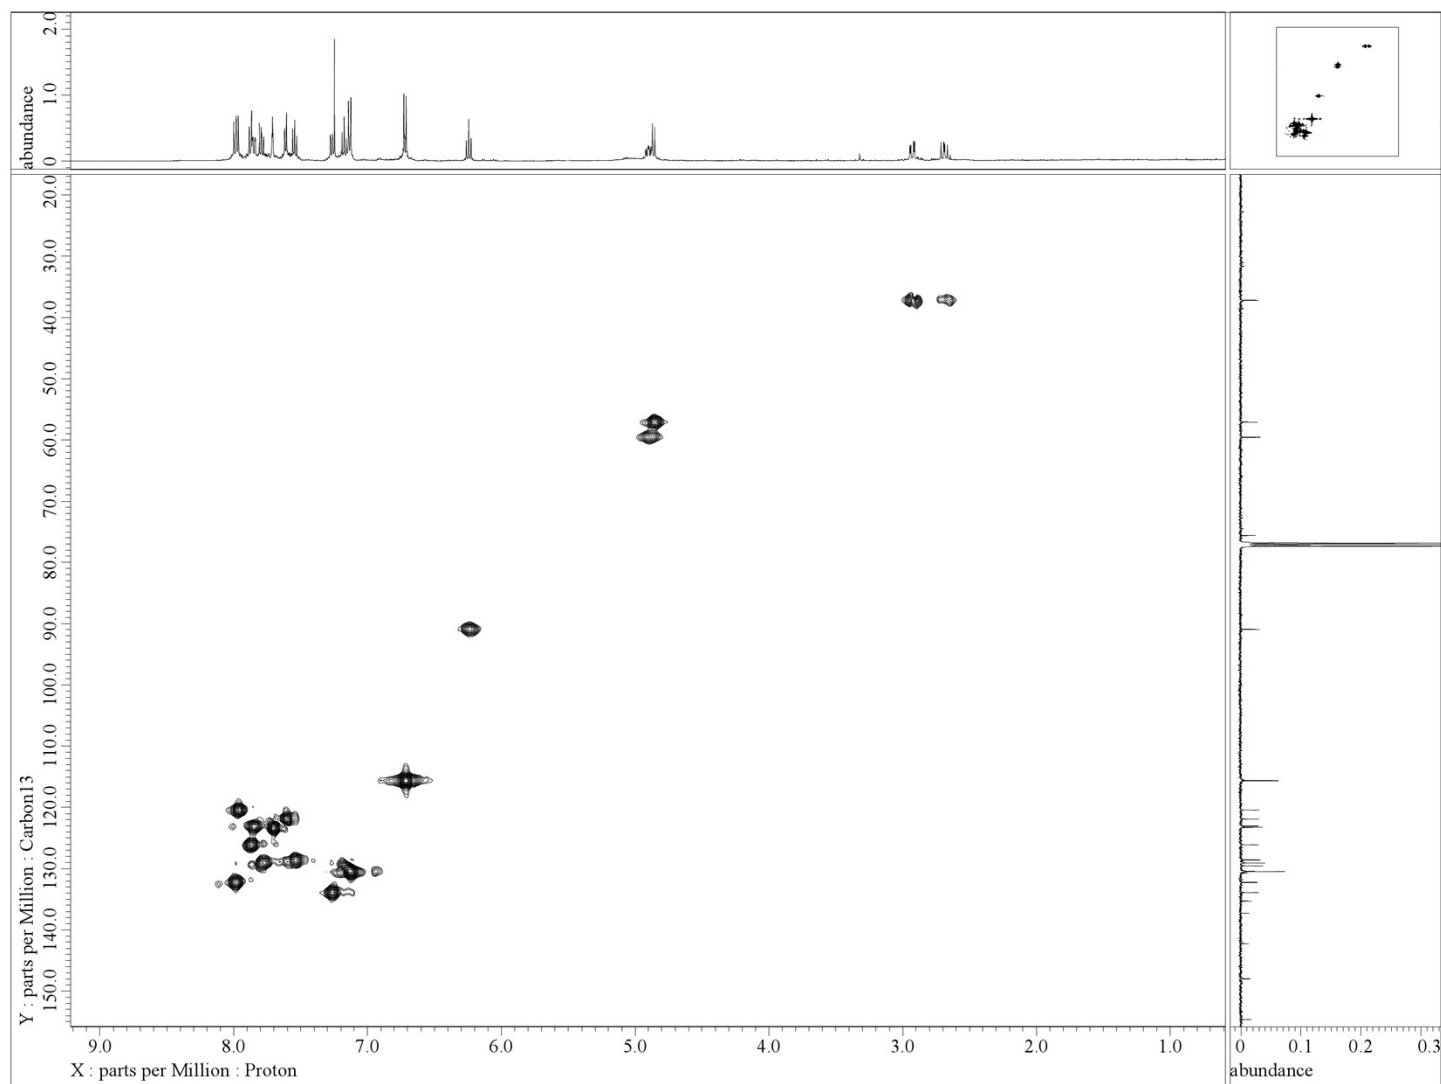

**Figure S5:** HMQC spectrum of **4f**

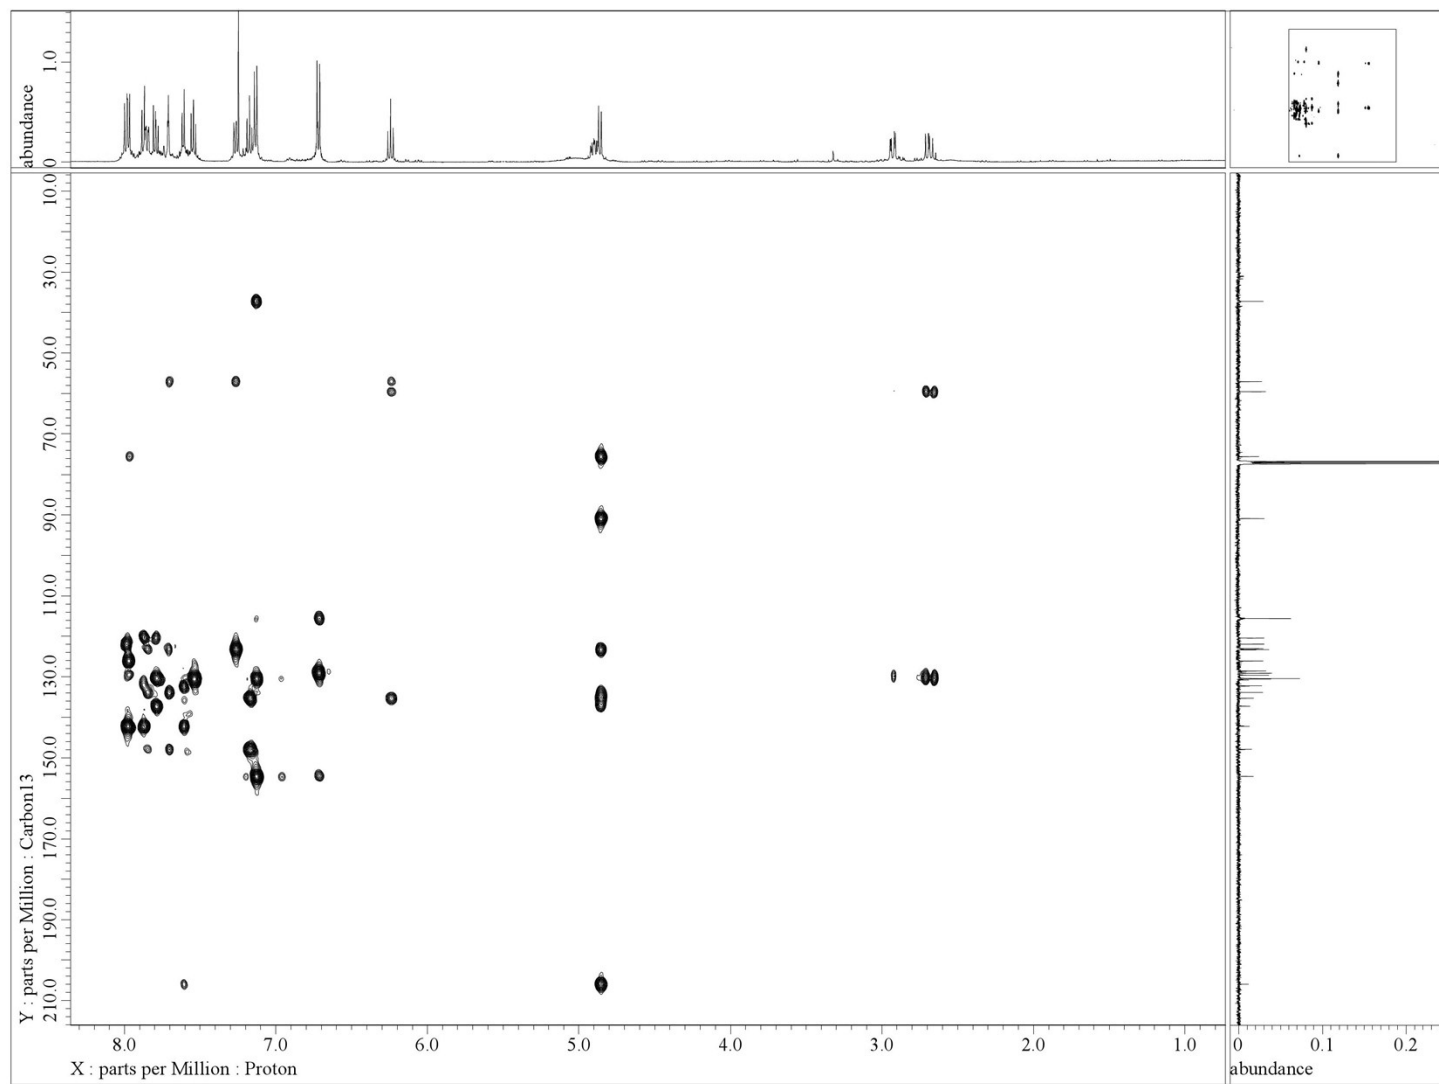

**Figure S6:** HMBC spectrum of **4f**

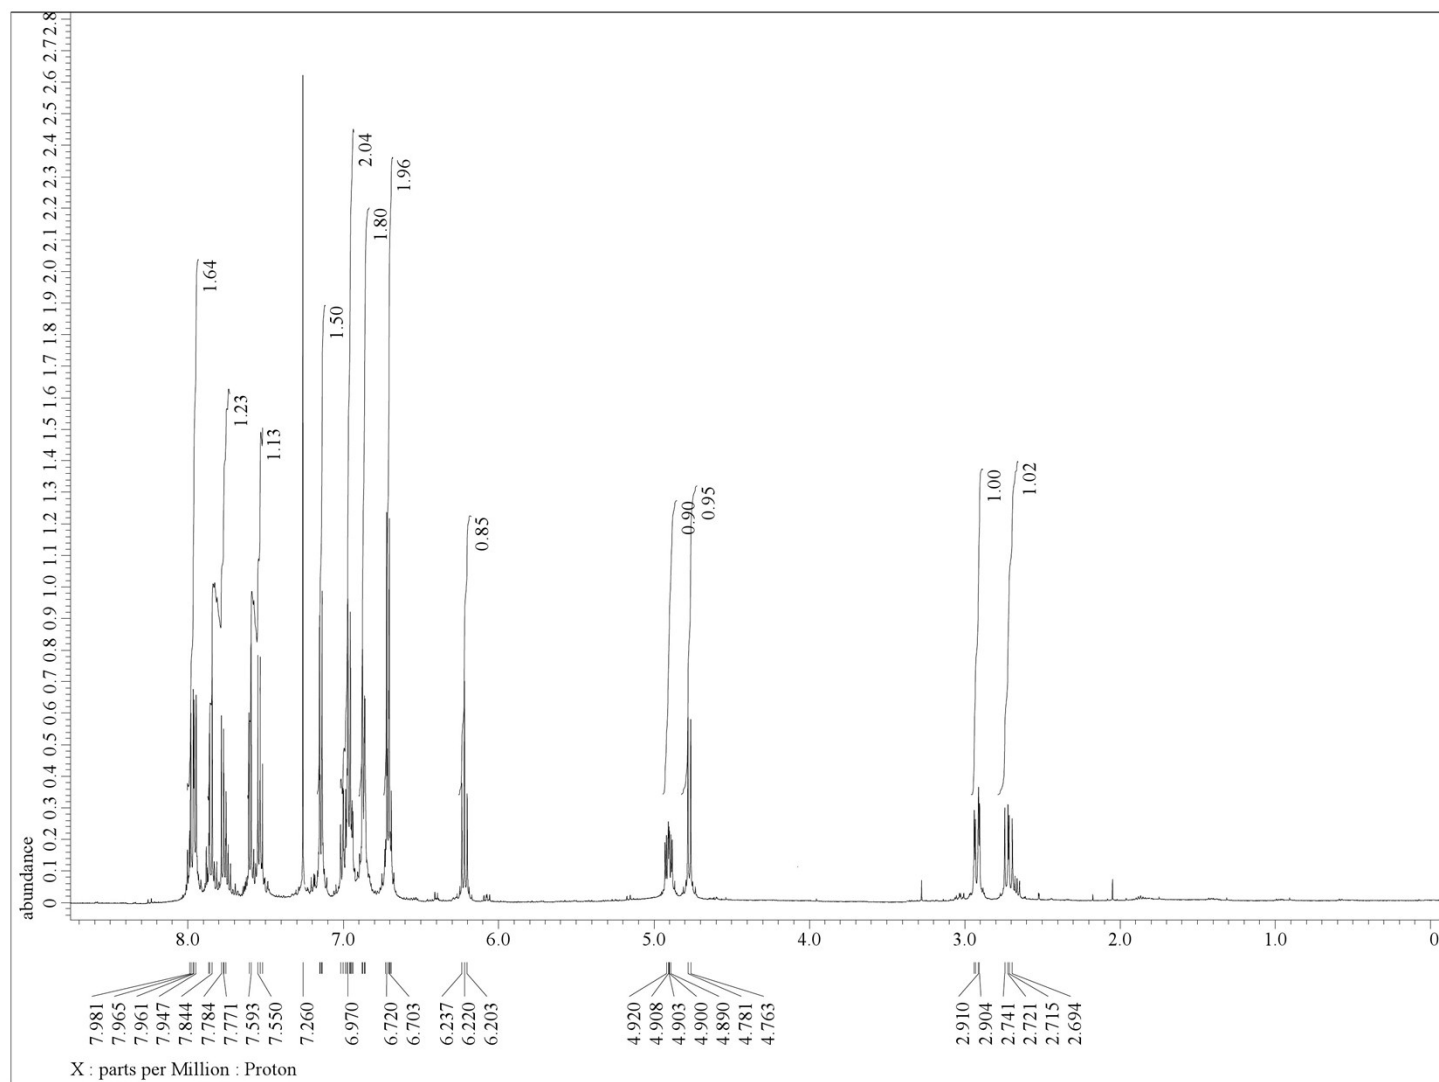

**Figure S7:**  $^1\text{H}$  NMR spectrum of **4a**

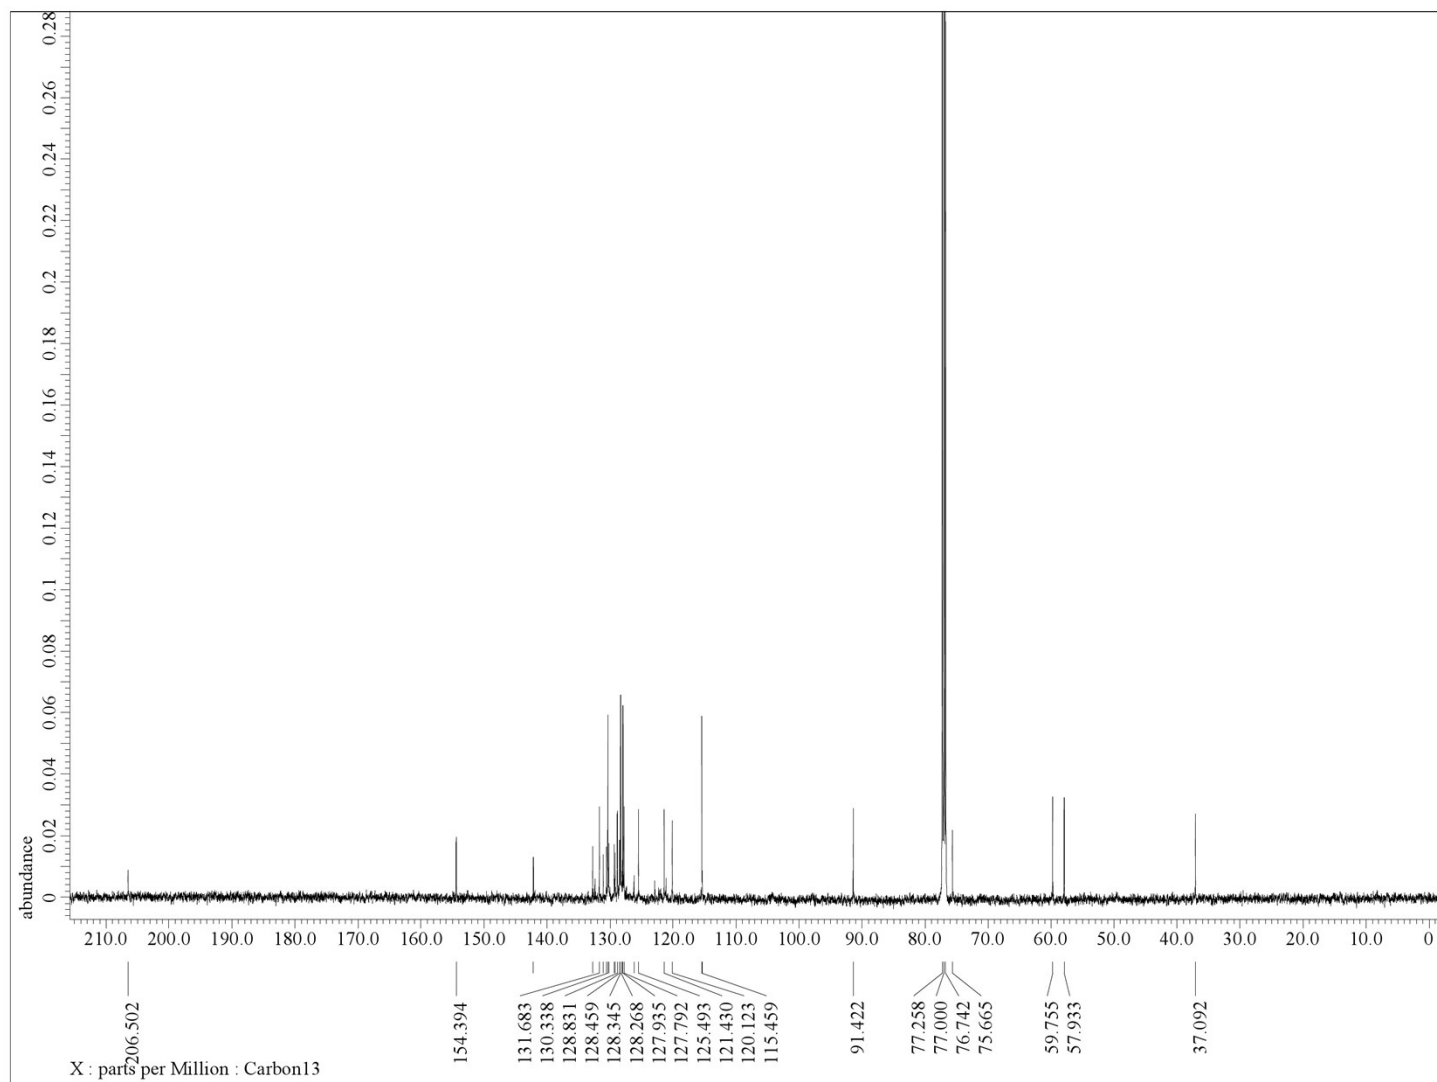

**Figure S8:**  $^{13}\text{C}$  NMR spectrum of **4a**

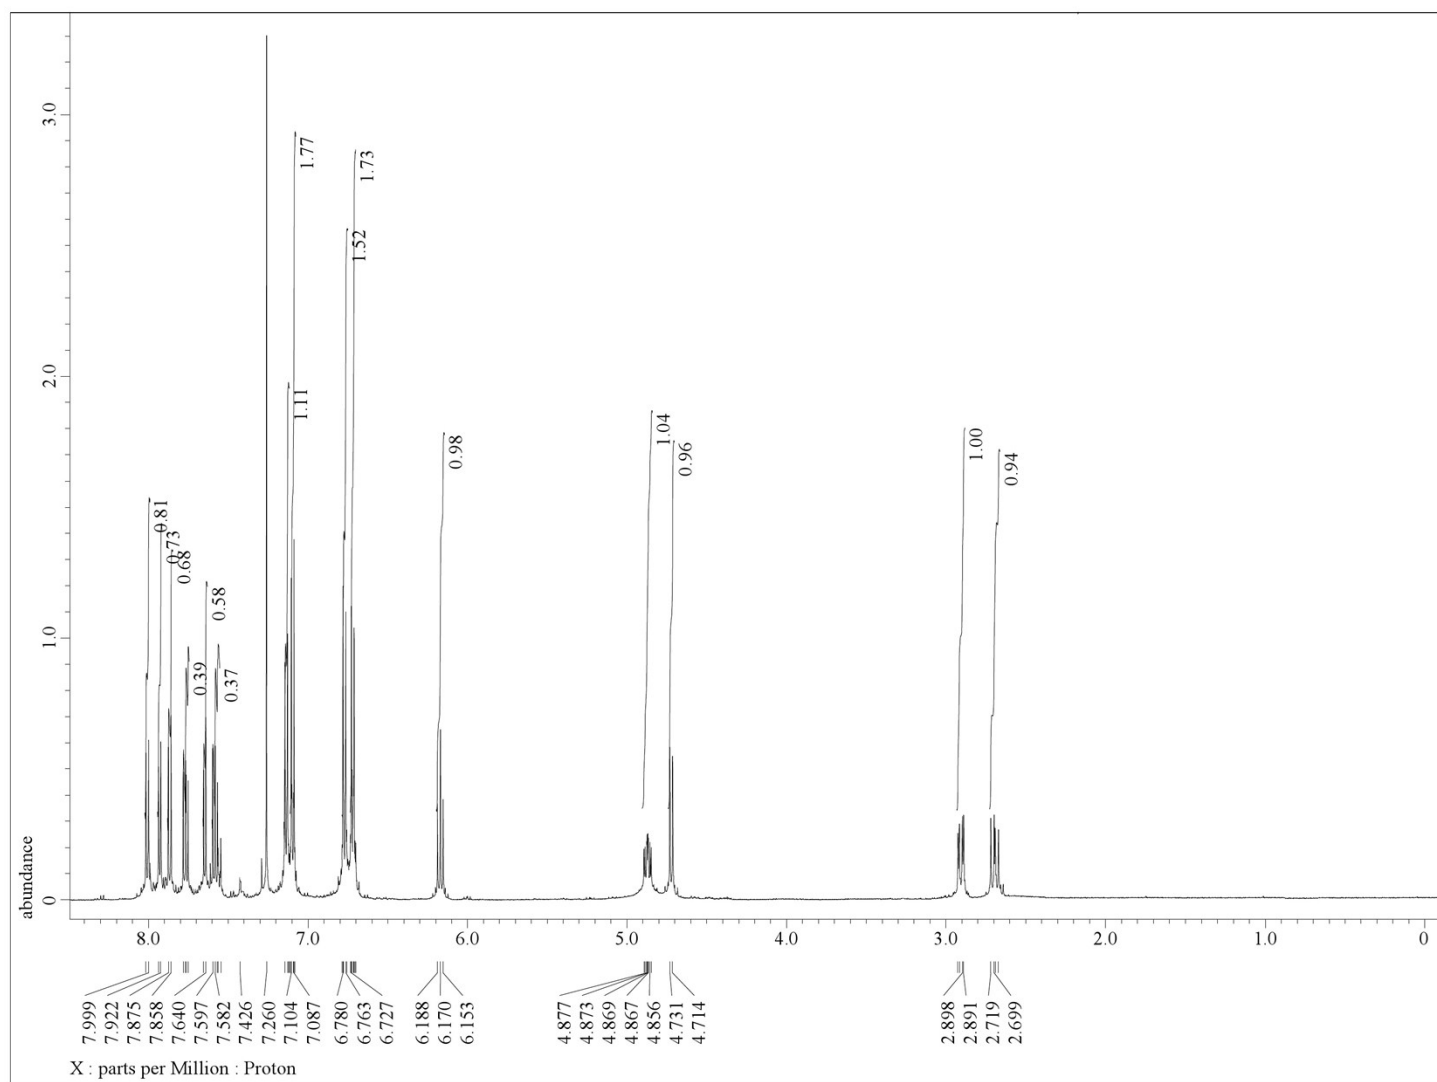

**Figure S9:**  $^1\text{H}$  NMR spectrum of **4b**

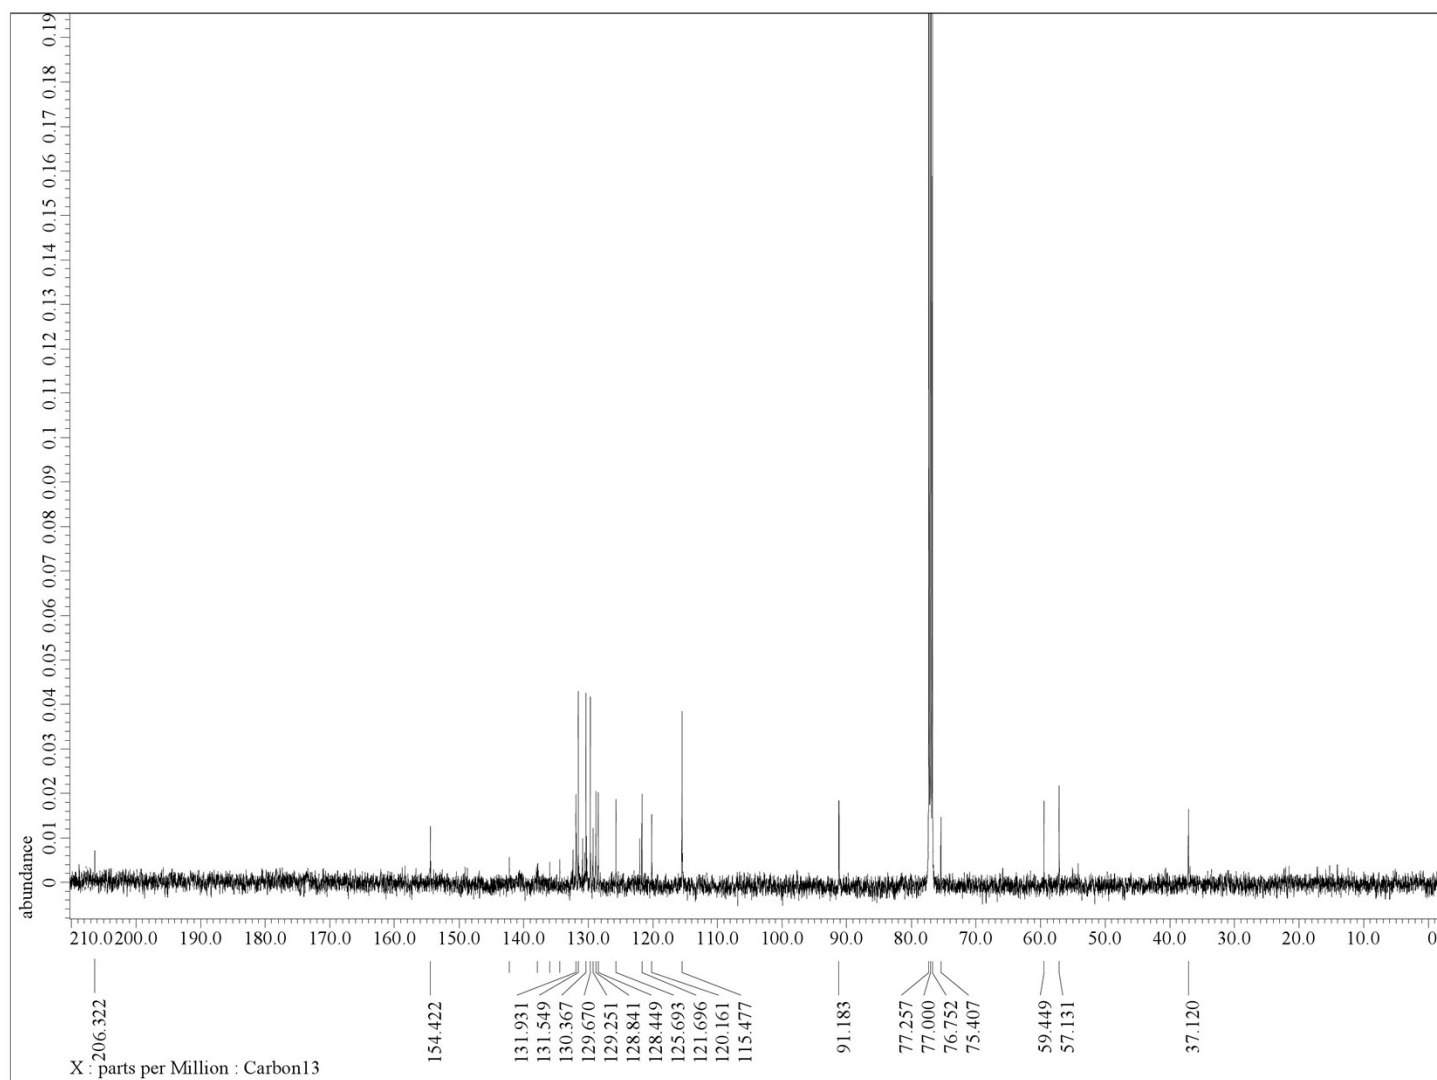

**Figure S10:**  $^{13}\text{C}$  NMR spectrum of **4b**

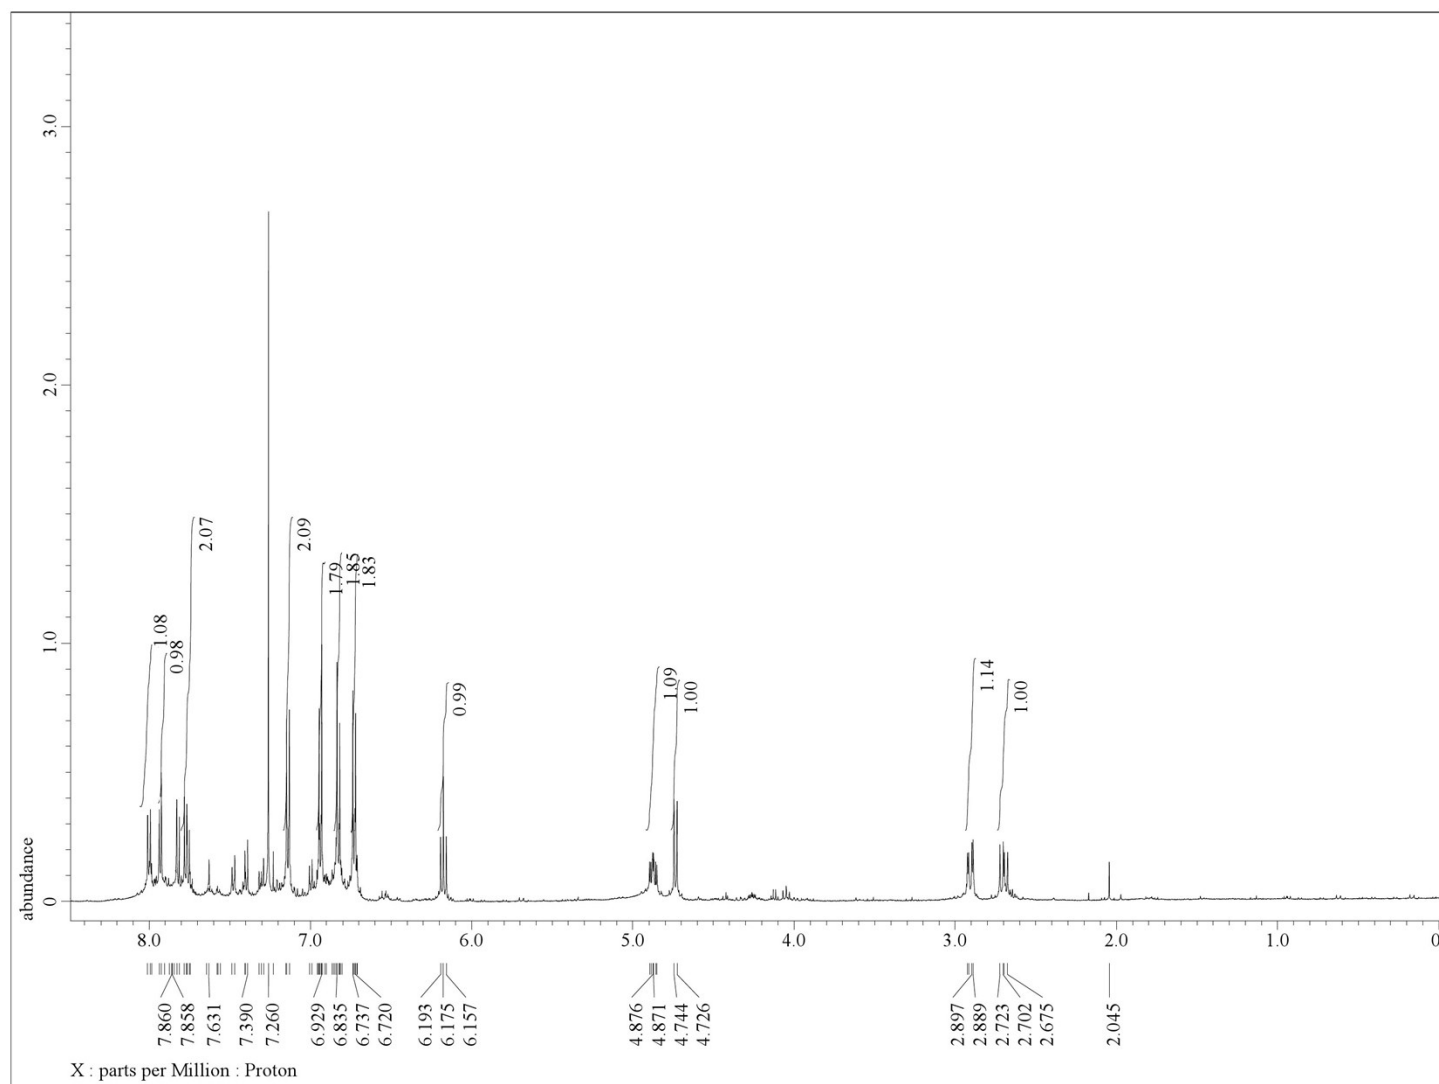

**Figure S11:** <sup>1</sup>H NMR spectrum of **4c**

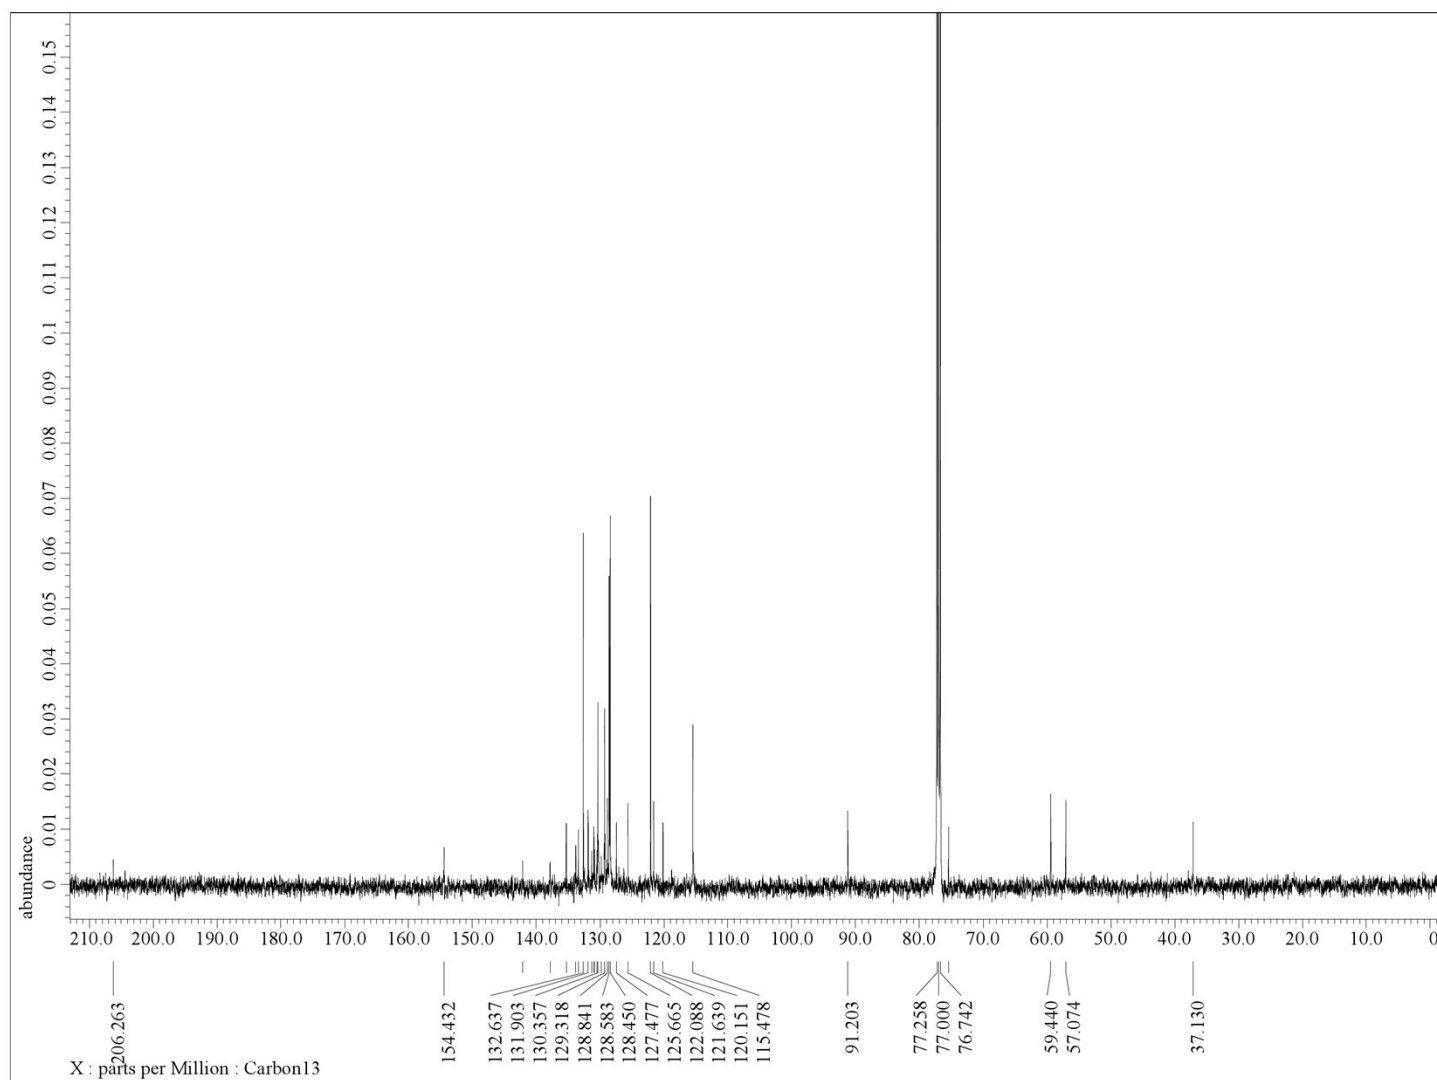

**Figure S12:**  $^{13}\text{C}$  NMR spectrum of **4c**

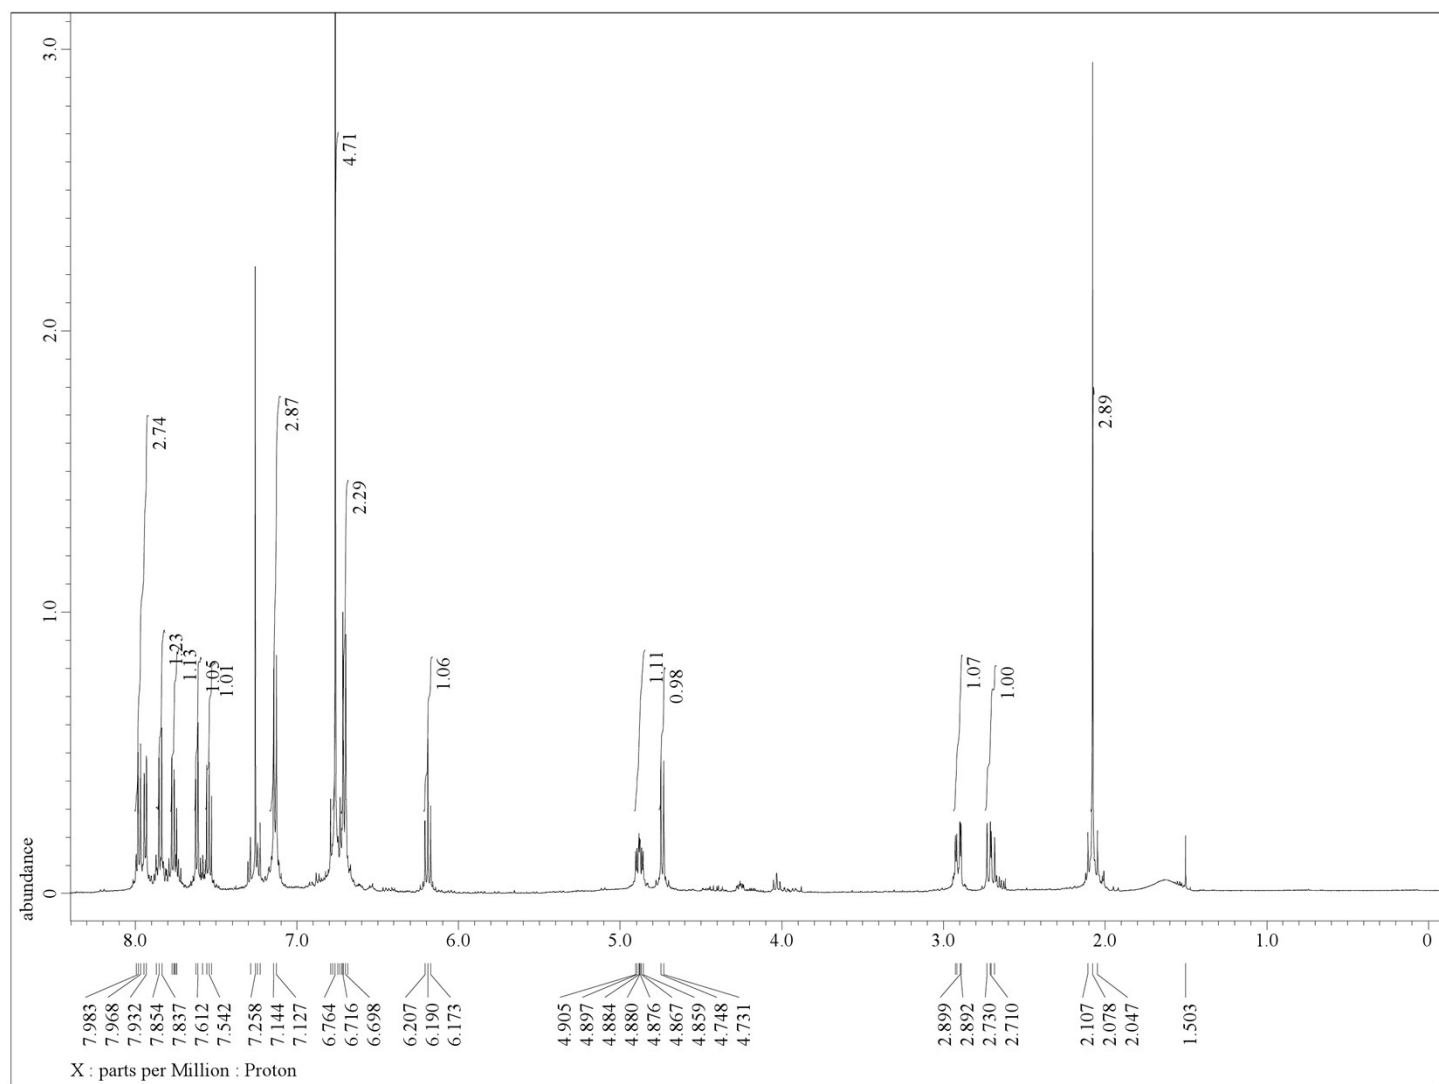

**Figure S13:**  $^1\text{H}$  NMR spectrum of **4d**

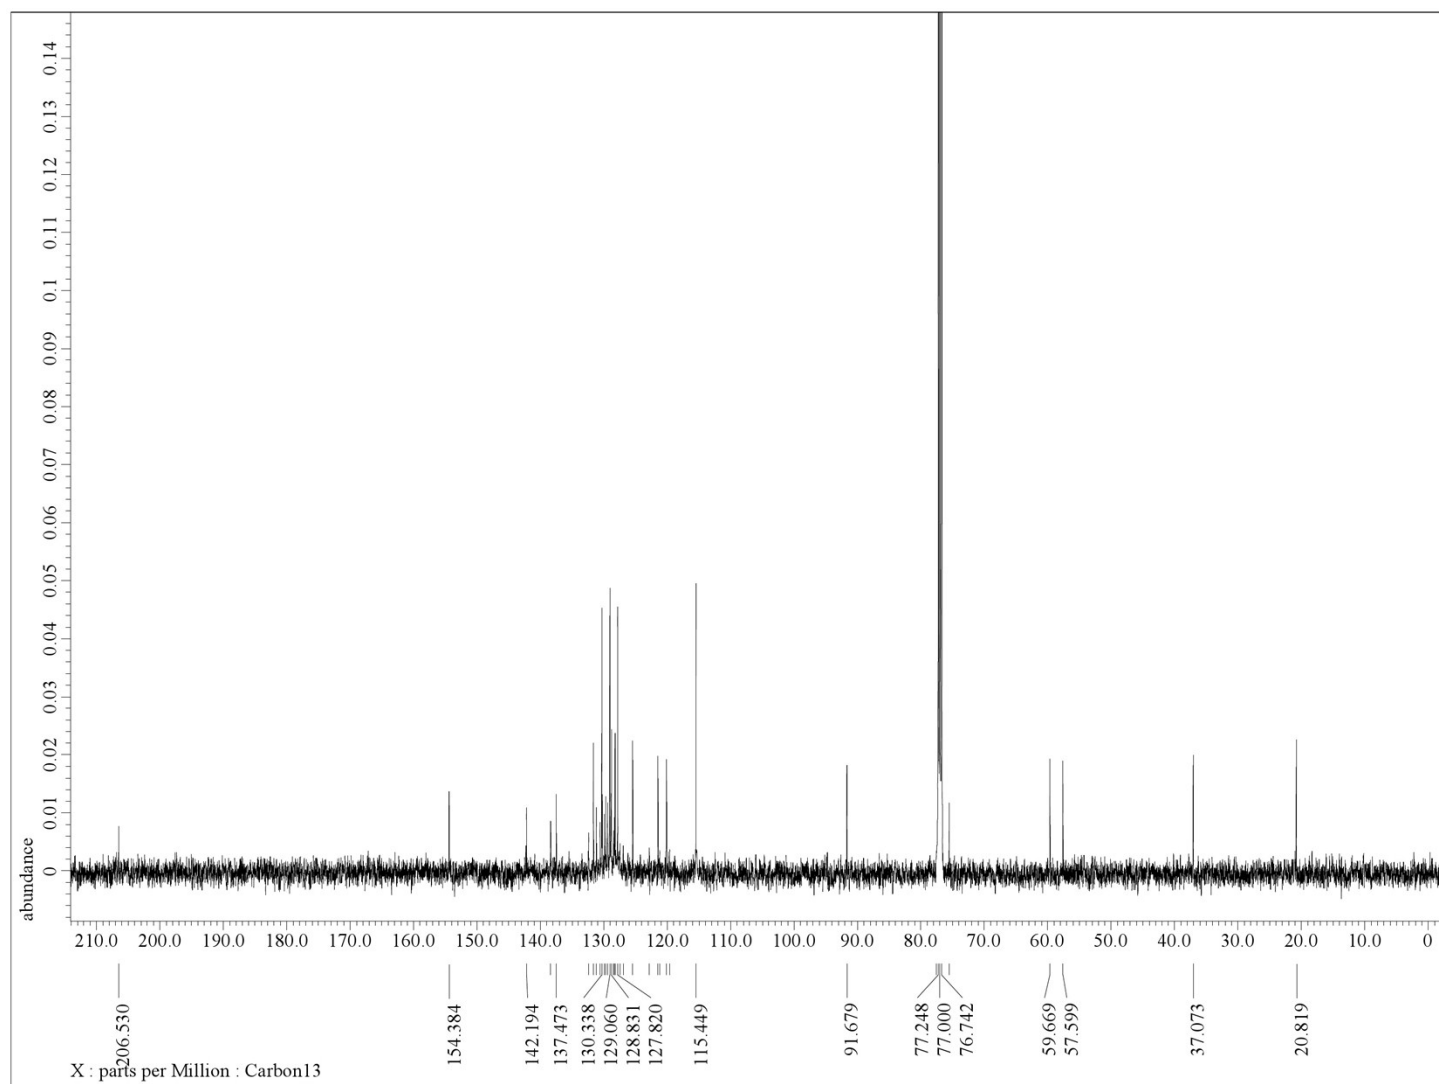

**Figure S14:**  $^{13}\text{C}$  NMR spectrum of **4d**

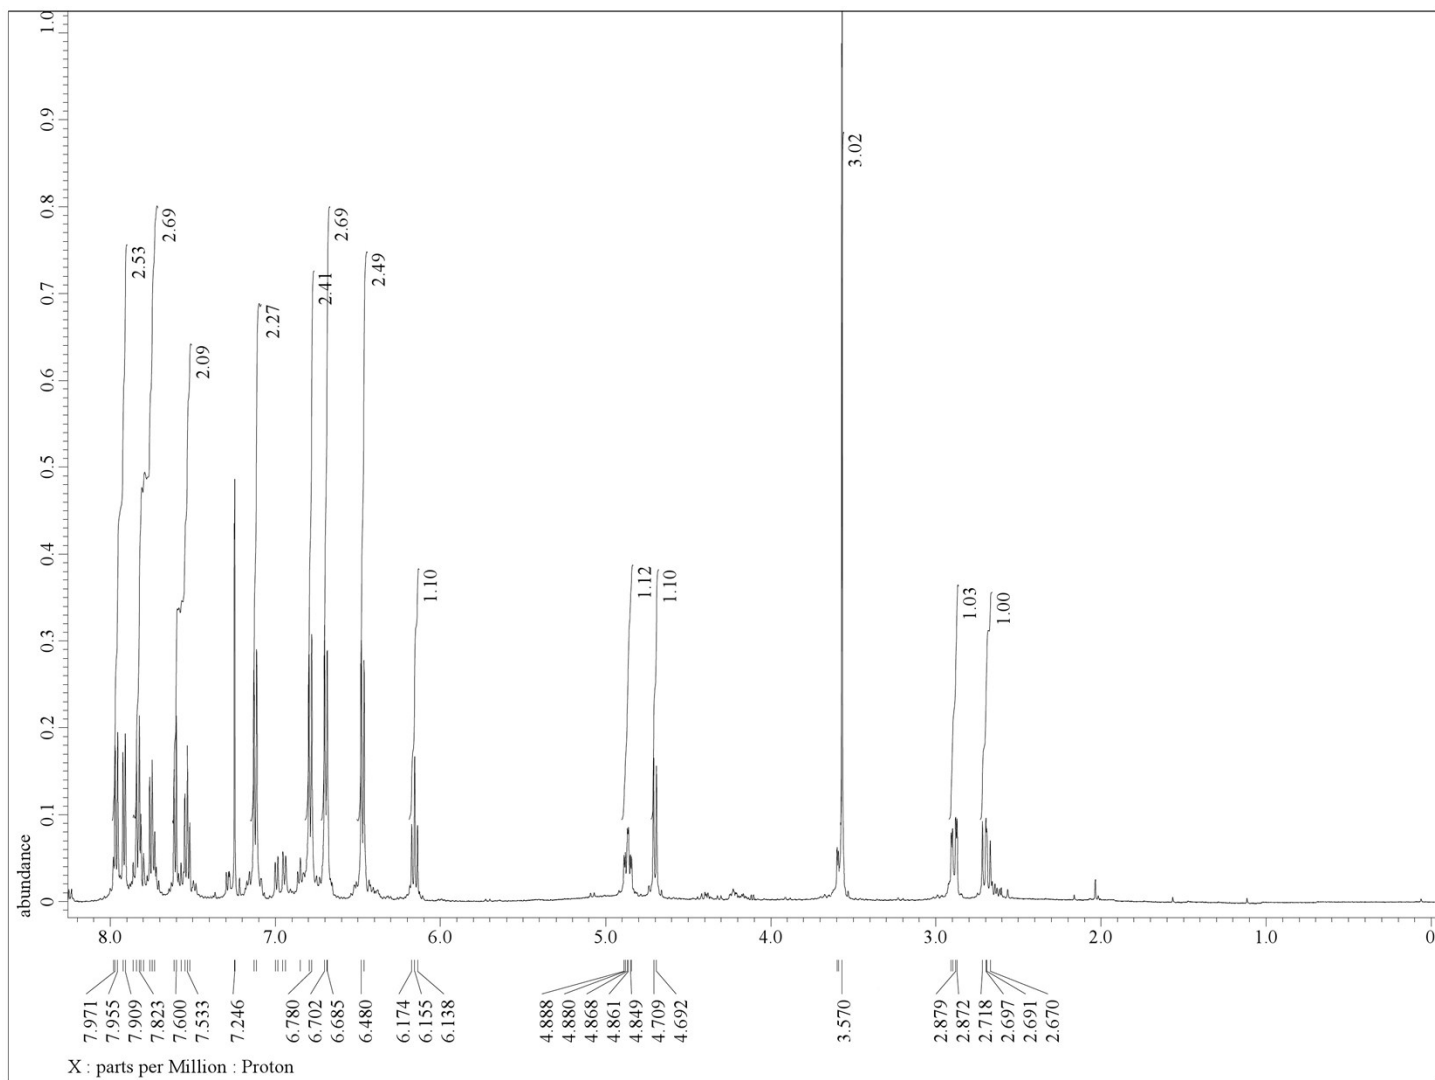

**Figure S15:** <sup>1</sup>H NMR spectrum of **4e**

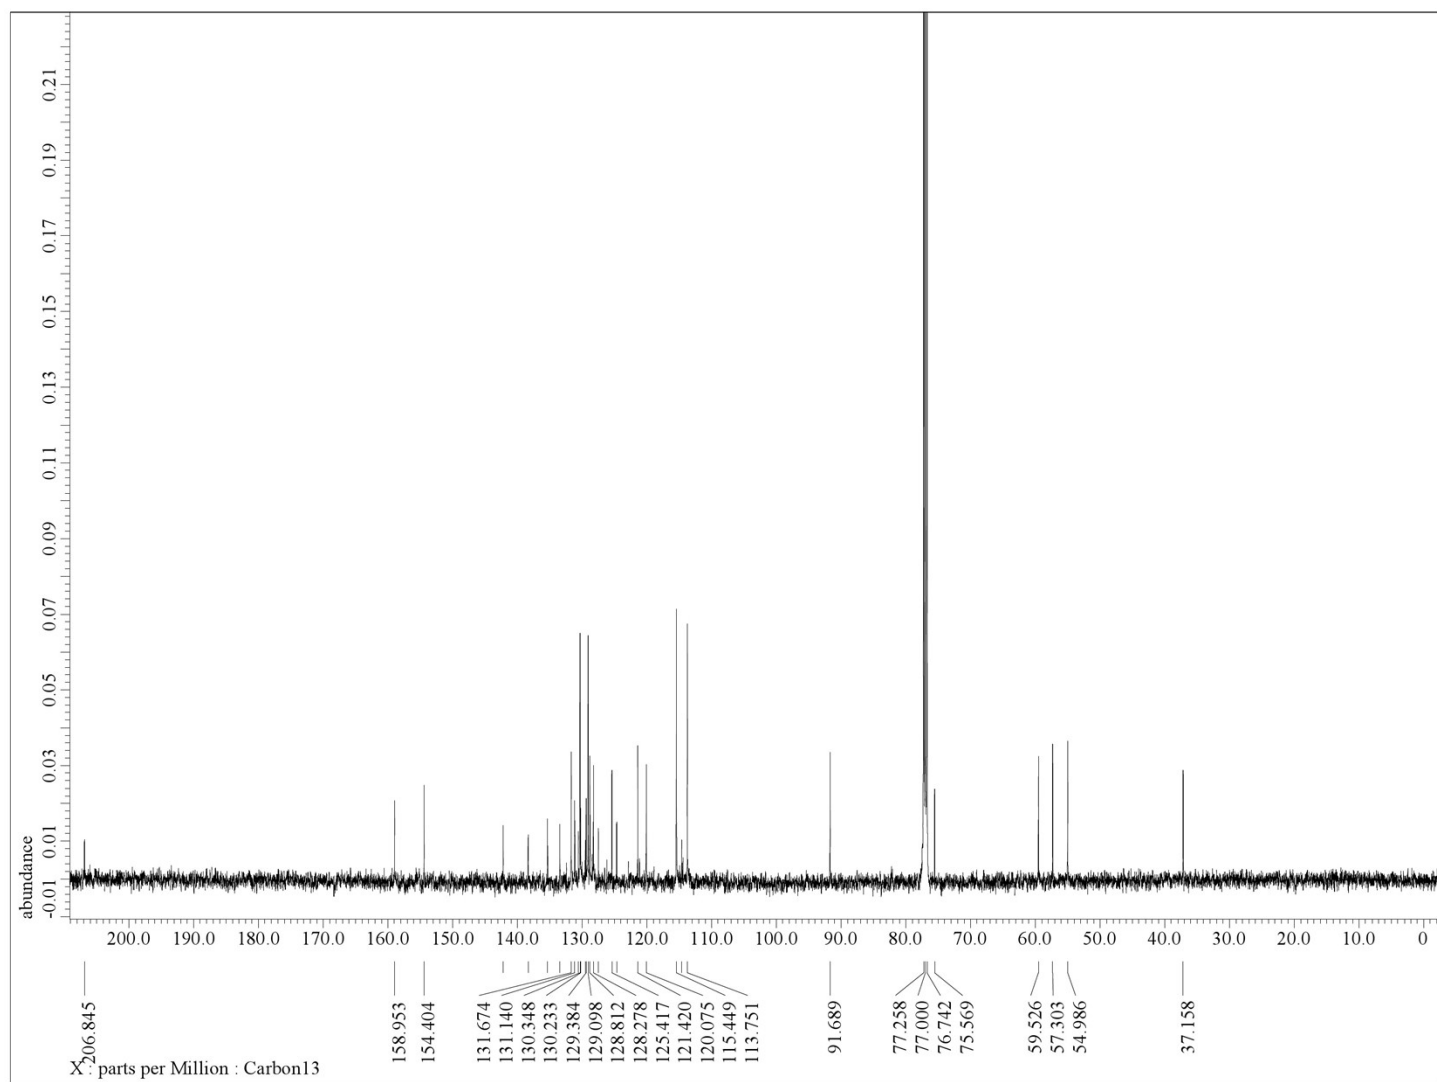

**Figure S16:**  $^{13}\text{C}$  NMR spectrum of **4e**

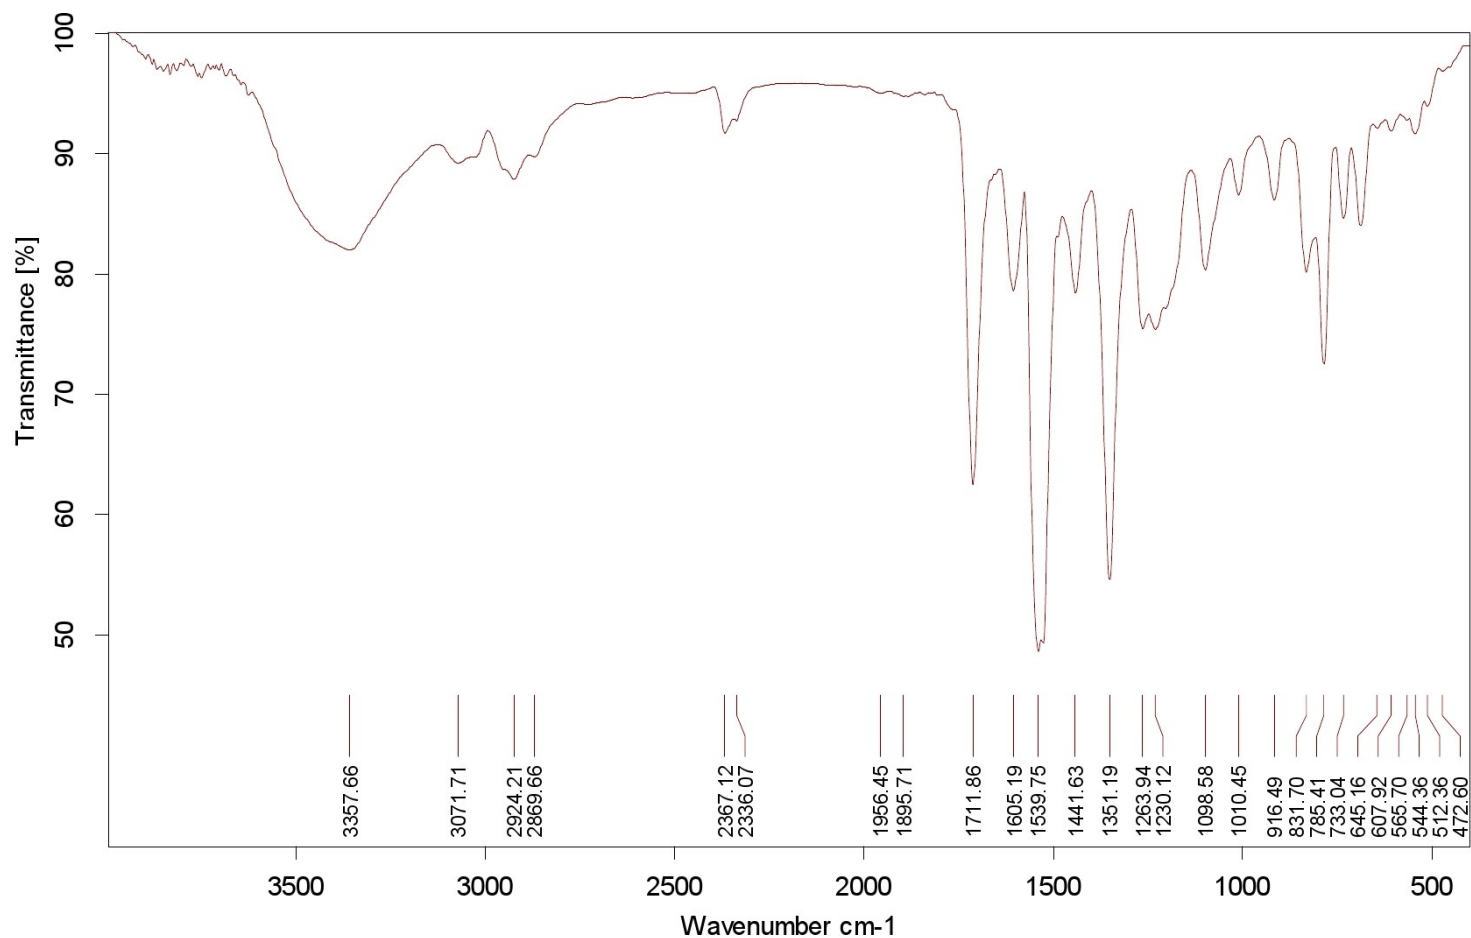

**Figure S17:** FT-IR spectrum of **4f**

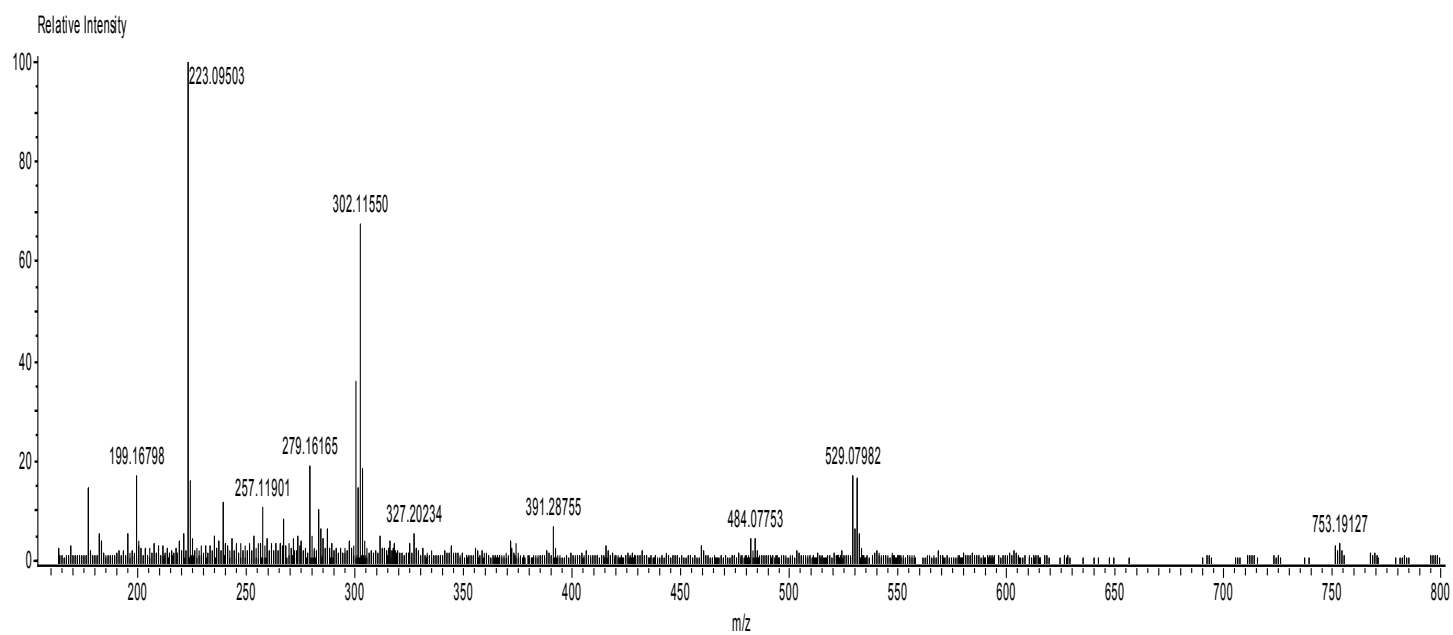

**Figure S18:** Mass spectrum of **4b**

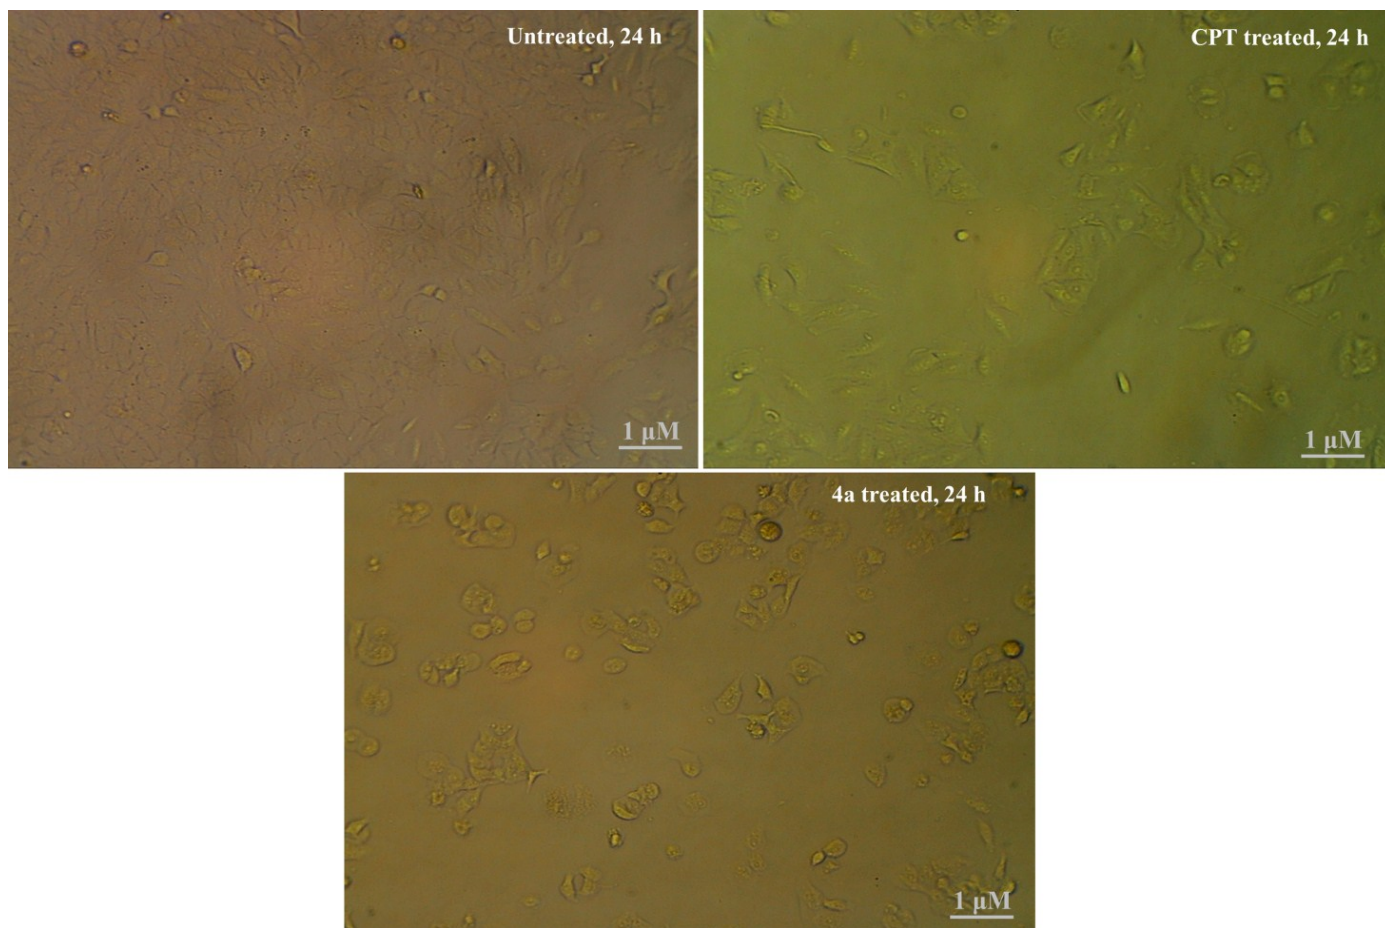

**Figure S19:** Comparison of the normal microscopic images of Jurkat cells following the treatment of CPT and compound **4a** with that of the cells of without any treatment. For the analysis, about  $1 \times 10^6$  cells/well were plated in a six-well plate initially for a period of 12 h and following the period, the cells were treated with the required concentrations of CPT and 4a and further incubated for a 24 h period. Following the period, the cell culture medium was removed, washed with distilled water, and fresh medium was added. By looking through the microscope, the cellular images were taken.

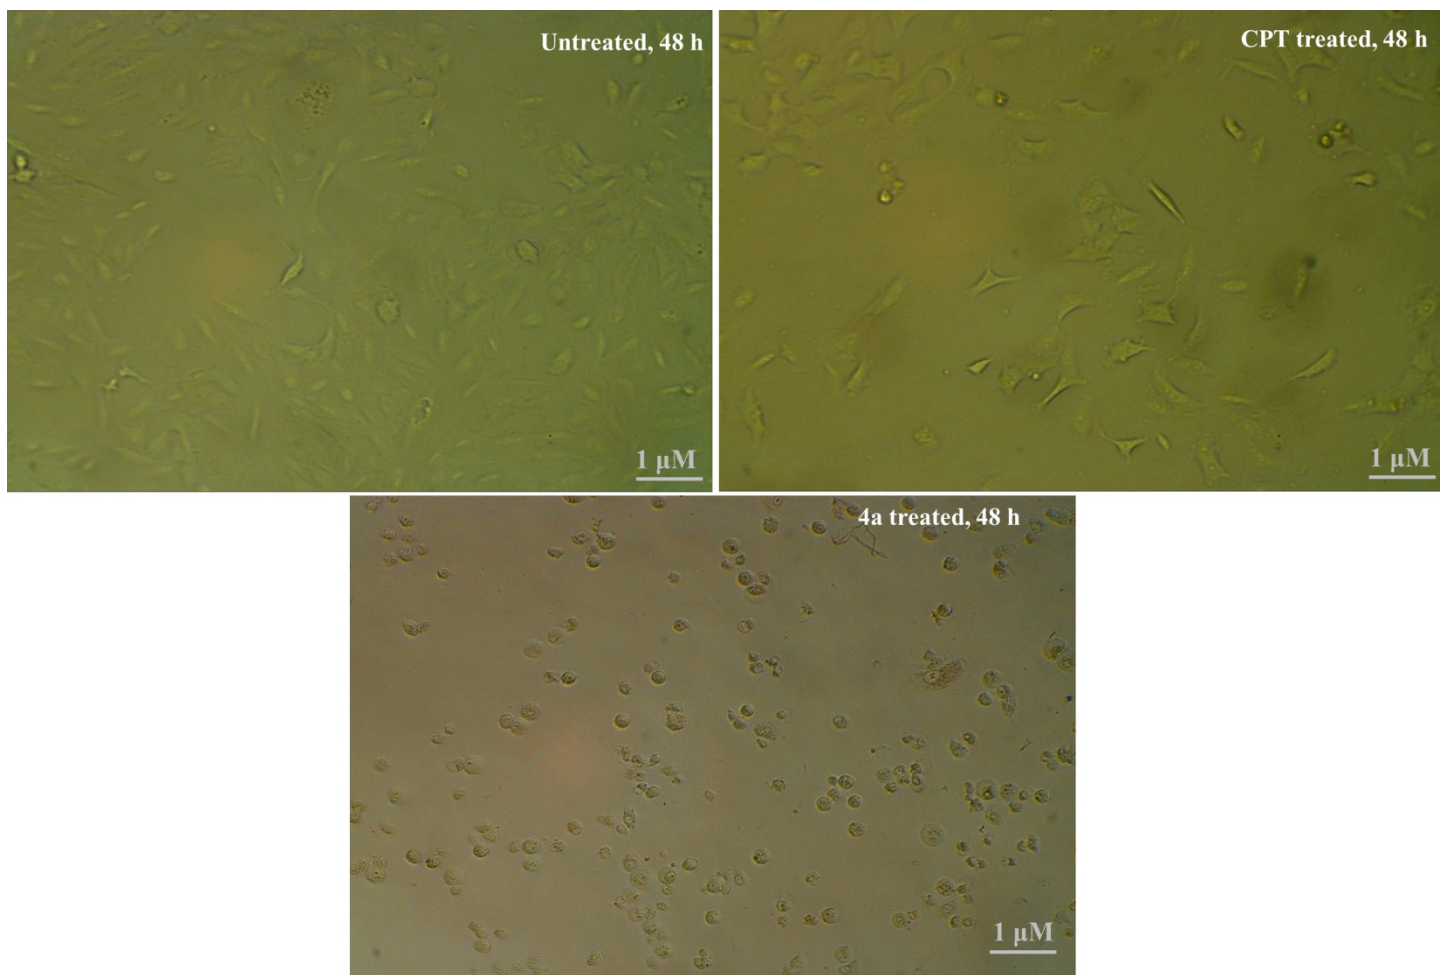

**Figure S20:** Comparison of the normal microscopic images of Jurkat cells following the treatment of CPT and compound **4a** with that of the cells of without any treatment. For the analysis, about  $1 \times 10^6$  cells/well were plated in a six-well plate initially for a period of 12 h and following the period, the cells were treated with the required concentrations of CPT and 4a and further incubated for a 48 h period. Following the period, the cell culture medium was removed, washed with distilled water, and fresh medium was added. By looking through the microscope, the cellular images were taken.

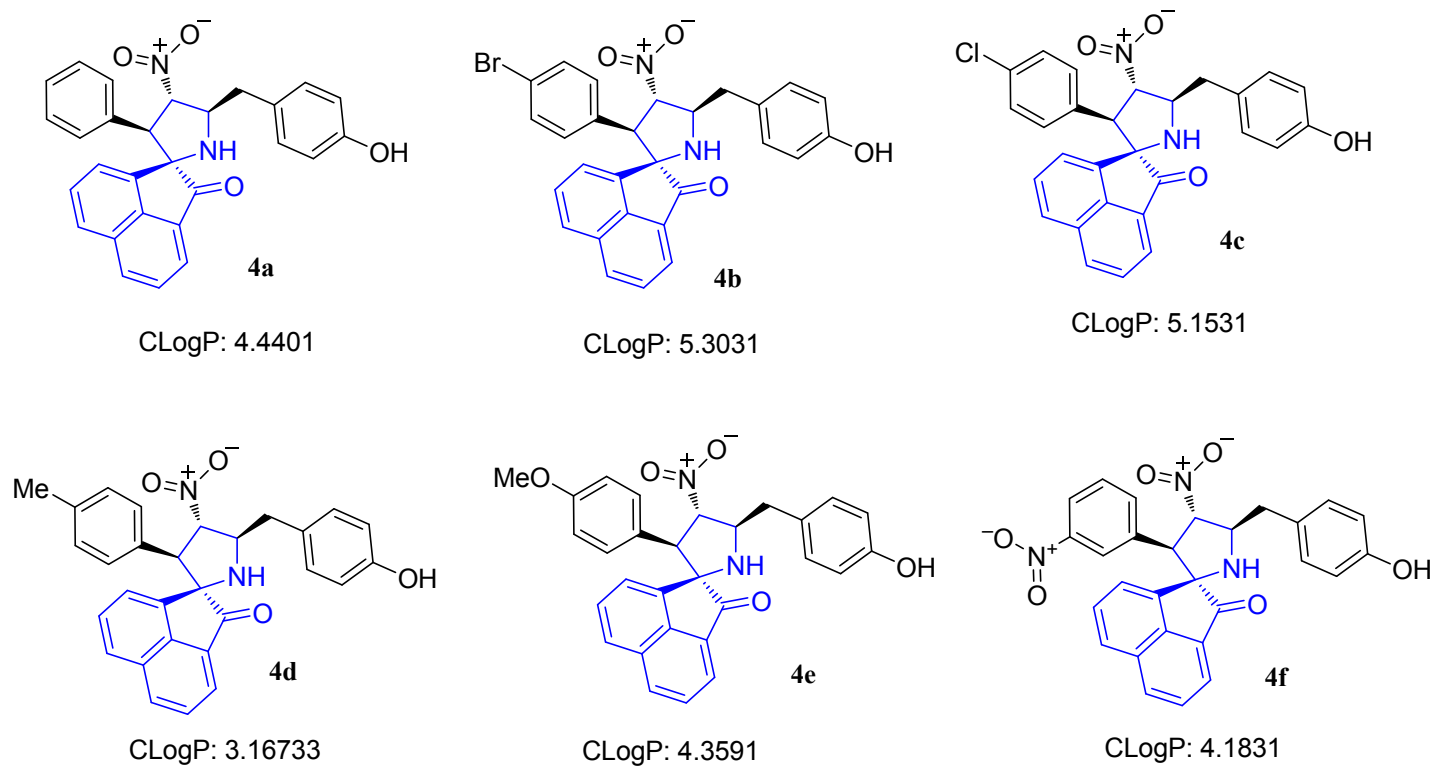

**Figure S21:**

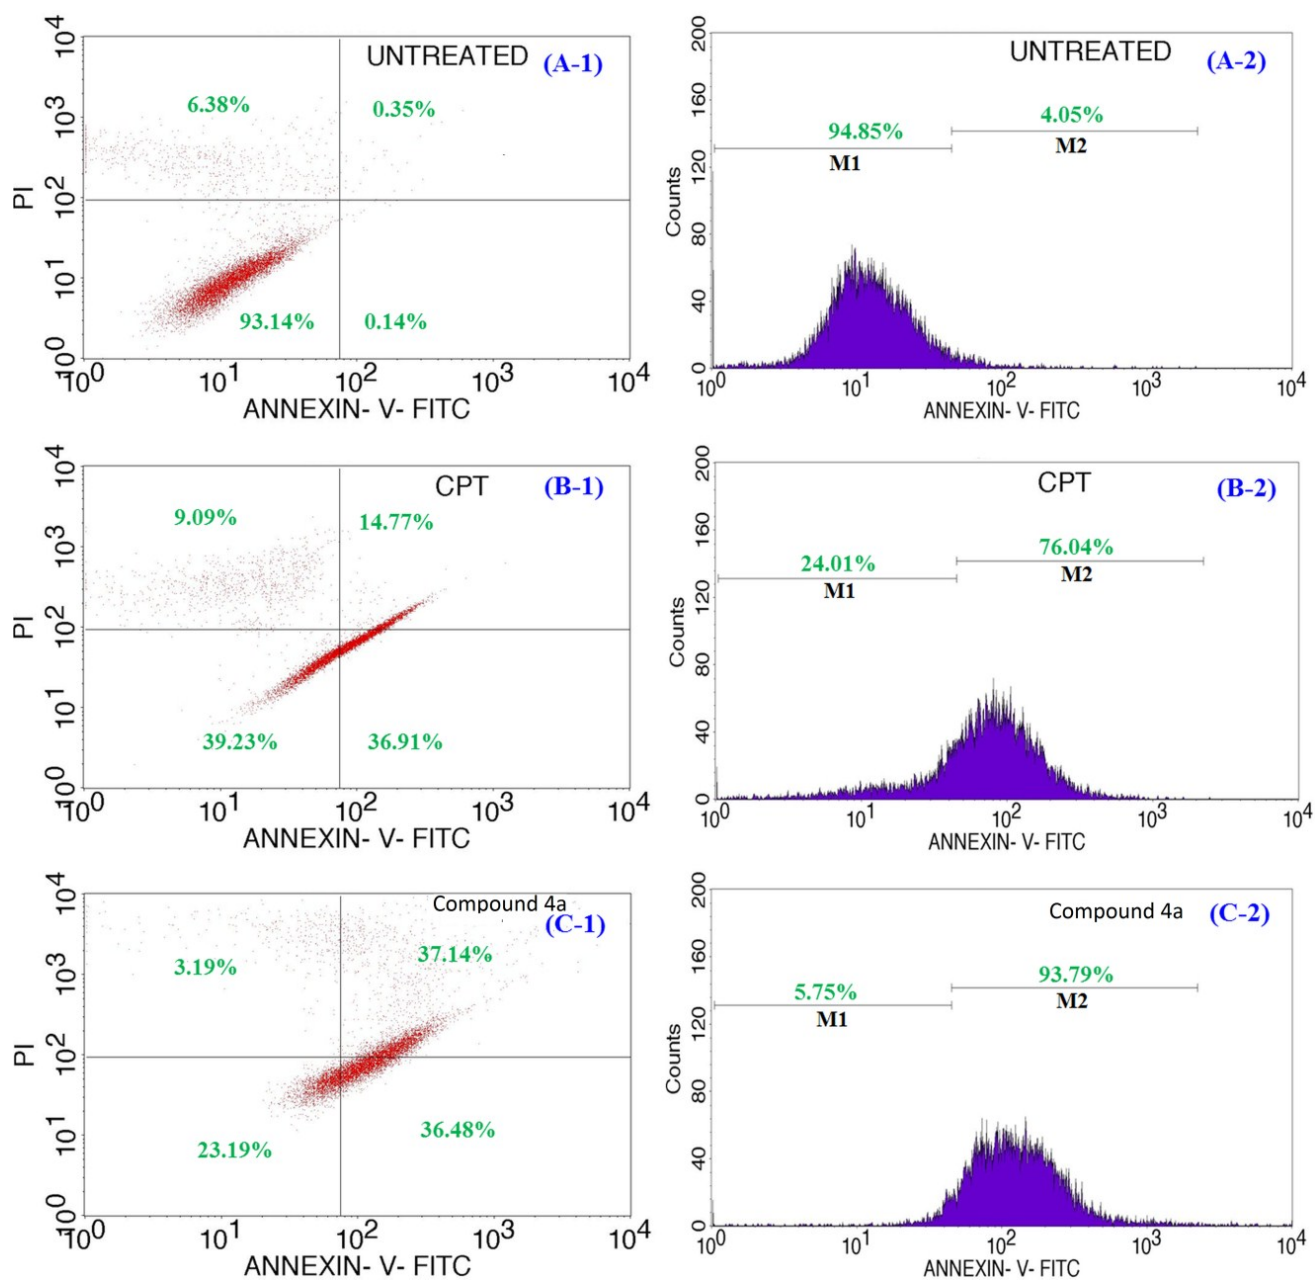

**Figure S22:** Apoptosis assay tested under 48 h incubation period for the Jurkat cells.

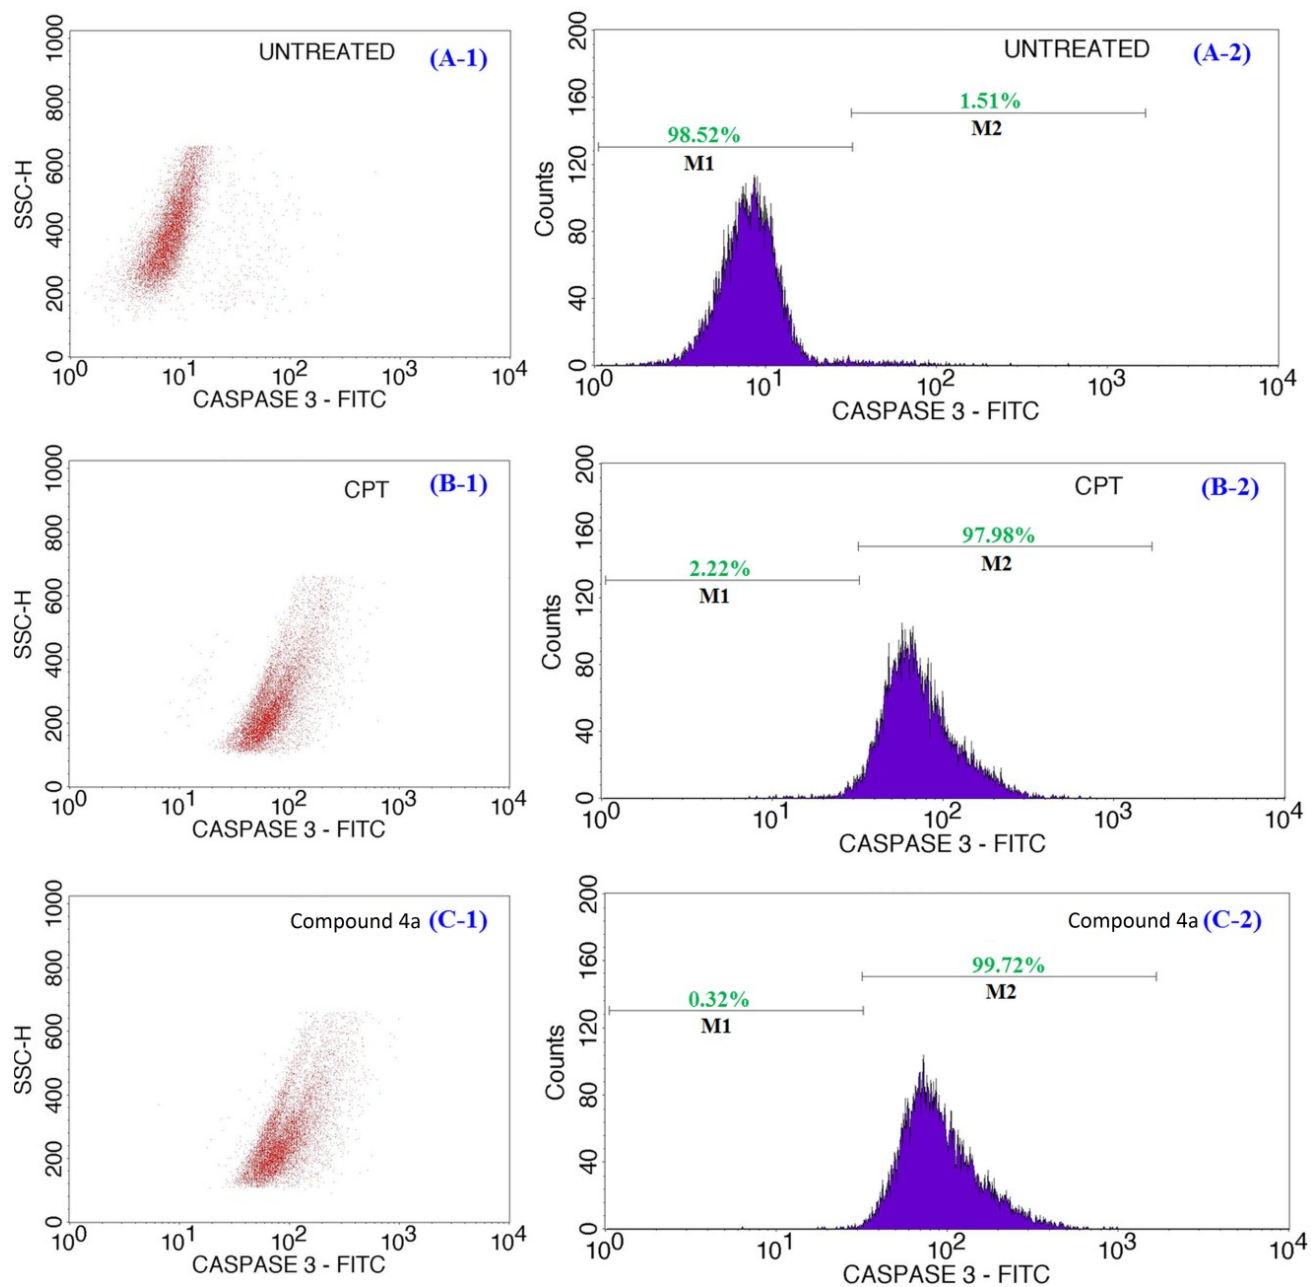

**Figure S23:** Caspase 3 activity assay when tested under a 48 h period for the Jurkat cells.
